# Supplementary material
Source: PubMed Central journal article supplement (PMC7832737)
Supplement: mmc1.pdf [file mmc1.pdf]

## Supporting Information:

### Repurposing approved Drugs as potential Inhibitors of 3CL- protease of SARS-CoV-2: Virtual screening and Structure Based Drug Design

*Franz-Josef Meyer-Almes\**

Department of Chemical Engineering and Biotechnology, University of Applied Sciences  
Darmstadt, Haardtring 100, 64295 Darmstadt, Germany.

Email: [franz-josef.meyer-almes@h-da.de](mailto:franz-josef.meyer-almes@h-da.de)

**A)**

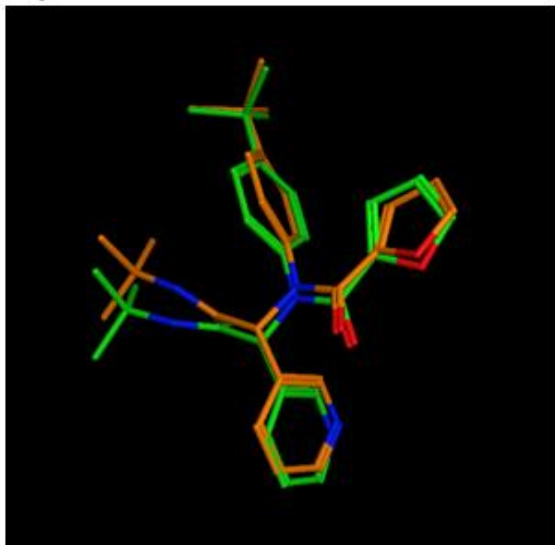

**B)**

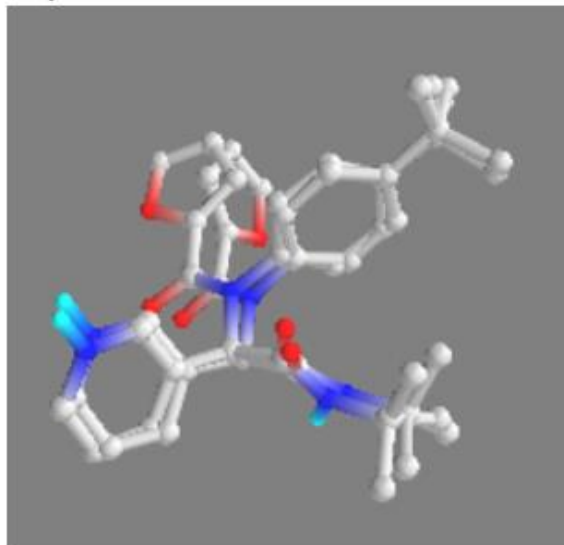

Fig. S1: Redocking of non-covalent ligand ML188 into the crystal structure of 3CL<sup>pro</sup> (PDB-ID: 3V3M) using A) MOE (AMBER 14 force field) and B) Autodock Vina yielding RMSD-values of 0.981 Å and 0.926 Å.

A)

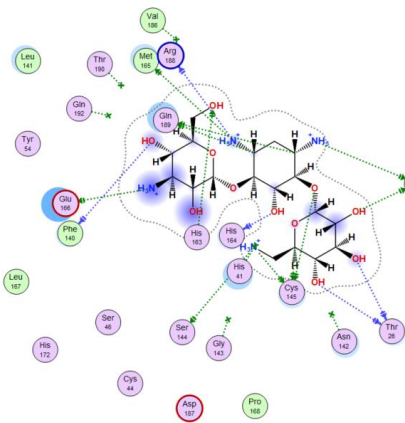

B)

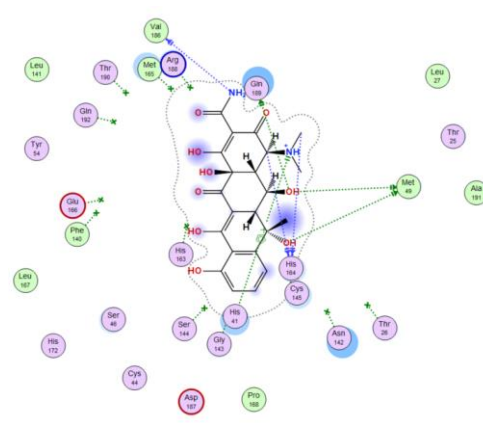

C)

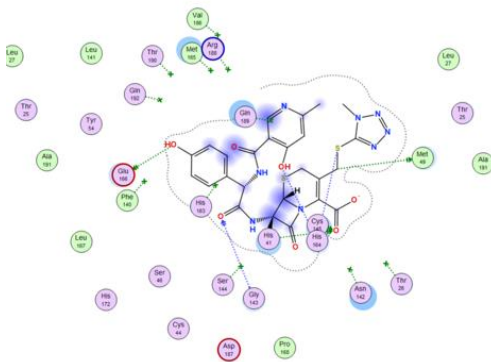

D)

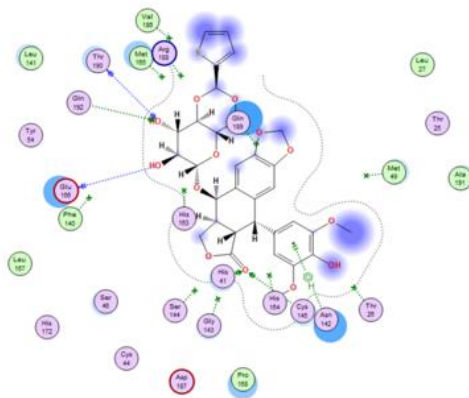

E)

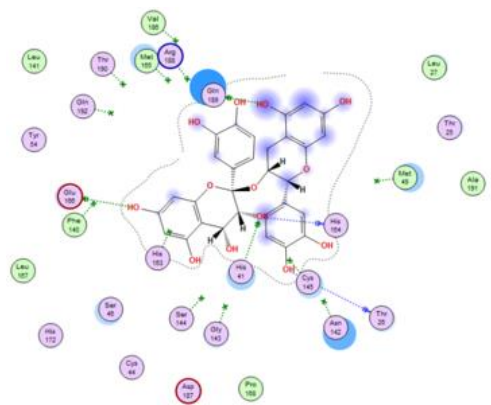

F)

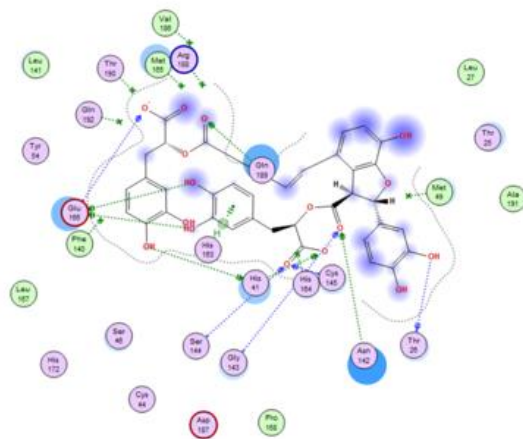

Fig. S2: Ligand interactions of A) Kanamycin, B) Oxytetracycline, C) Cefpiramide, D) Teniposide, E) Proanthocyanidins and F) Salvianolic acid B

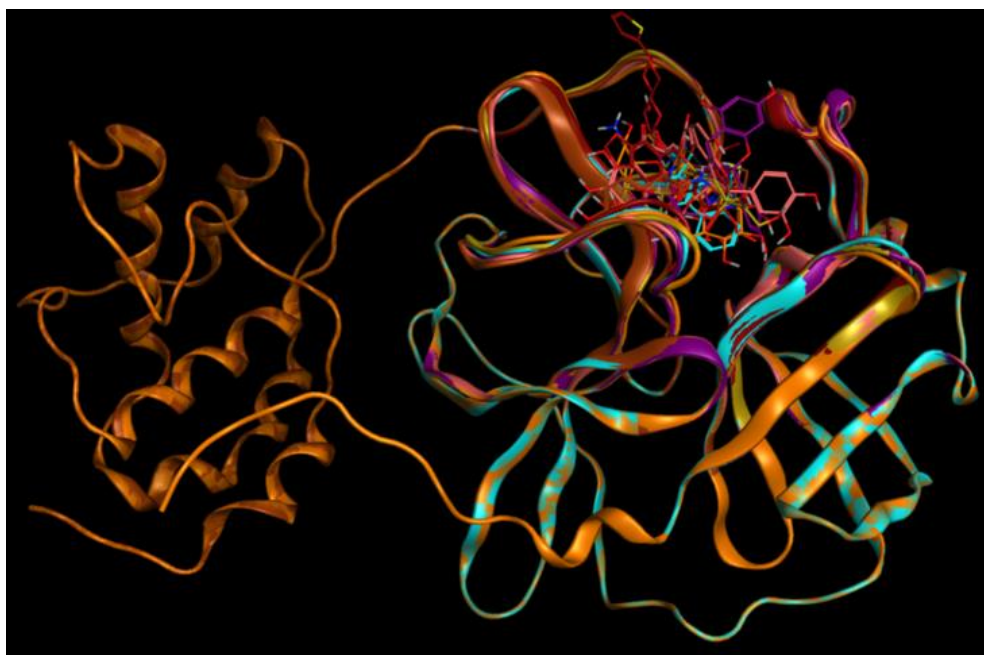

Fig. S3: Overlay of docked (induced fit) and energy minimized complexes between 3CLpro (PDB-ID: 6LU7) and the following ligands: Kanamycin, Oxytetracycline, Cefpiramide, Doxorubicin, Teniposide, Proanthocyanidins, Salvianolic acid B. All ligands dock into the conservative active site of the cysteine protease.

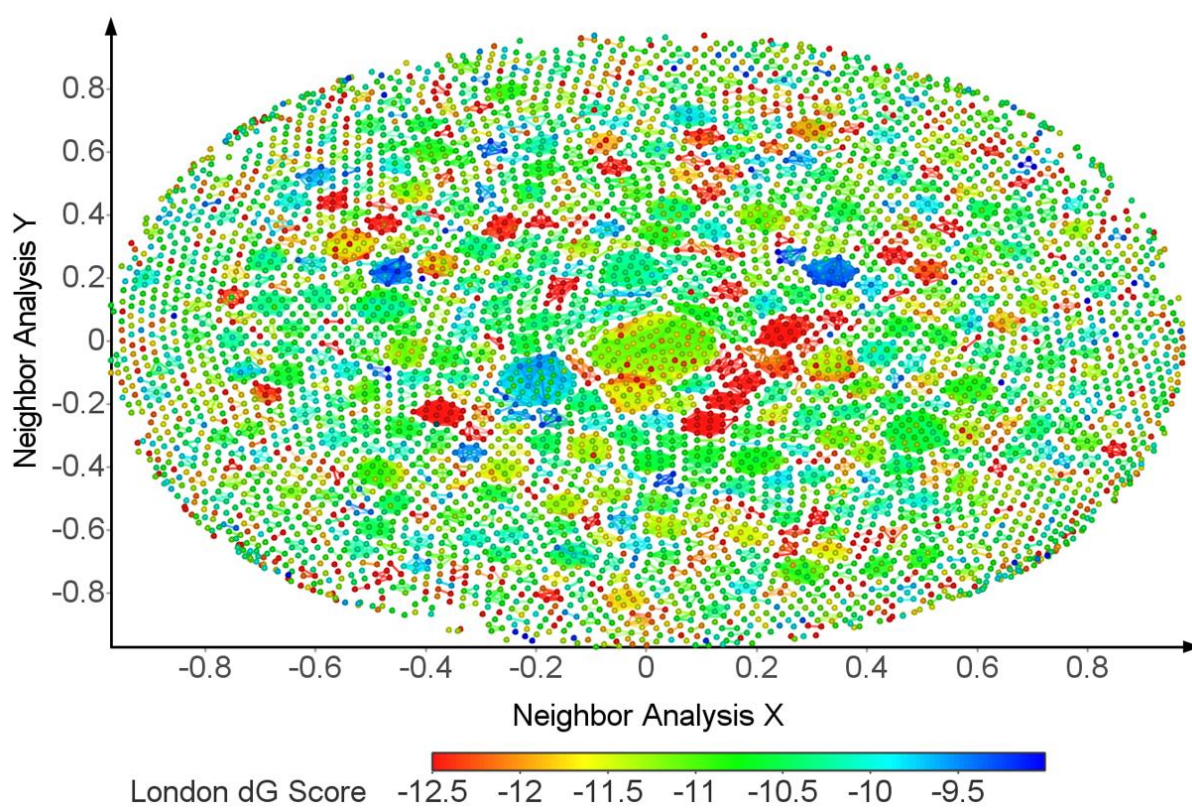

Fig. S4: Similarity/Activity cliff analysis of 5517 hits from the pharmacophore search of ZINC15 library demonstrating several clusters of similar chemical structures with high docking scores ( $< -11.5$ ).

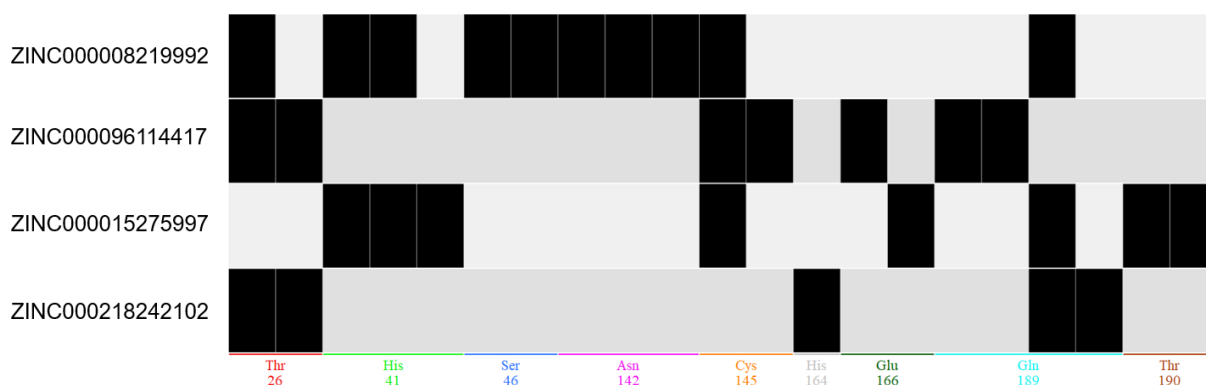

Fig. S5: Different patterns of protein-ligand interaction fingerprints (PLIFs) of best scoring hits from pharmacophore search against ZINC15 library within the active site of 3CL<sup>pro</sup>.

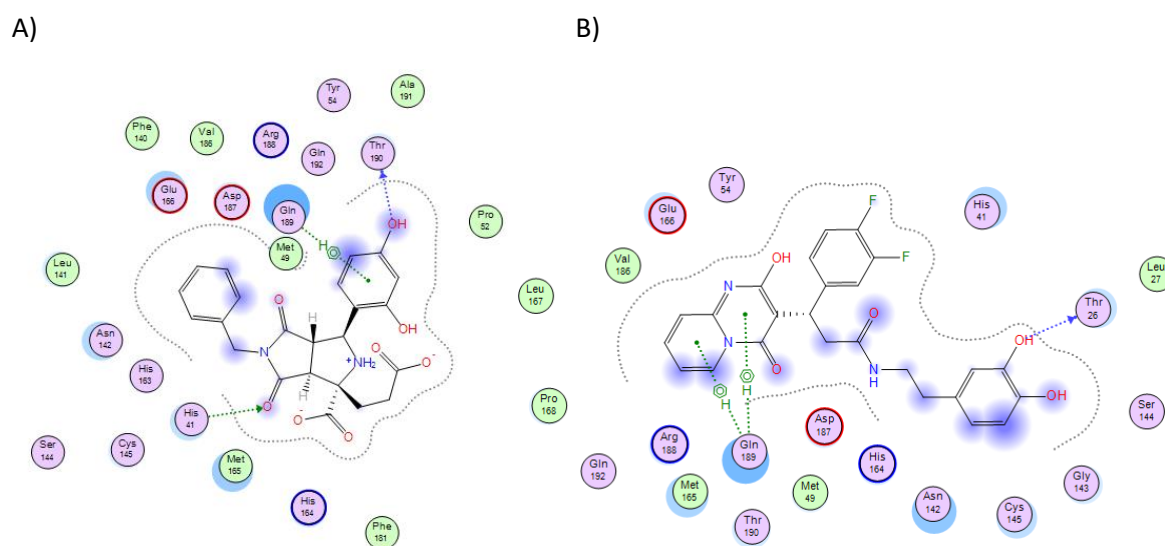

Fig. S6: 2D protein-ligand interactions between 3CL<sup>pro</sup> of SARS-CoV-2 and A) ZINC000015275997 and B) ZINC000218242102. There are new opportunities for aliphatic-aromatic interactions with Gln189 and H-bond-interactions with Thr190.

Starting point:  
Oxytetracycline

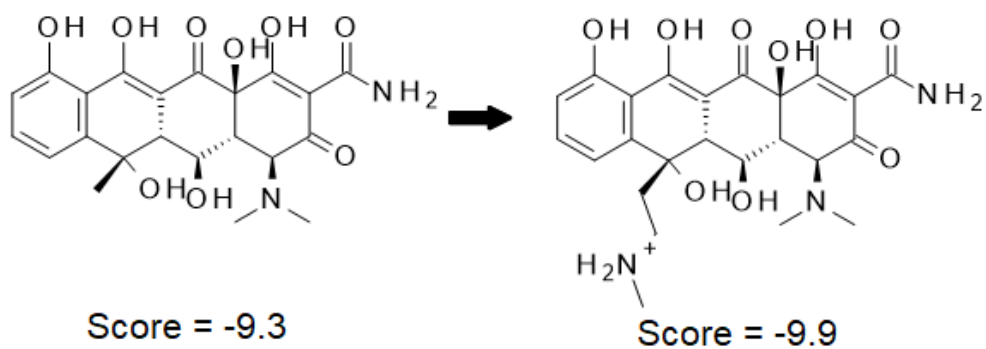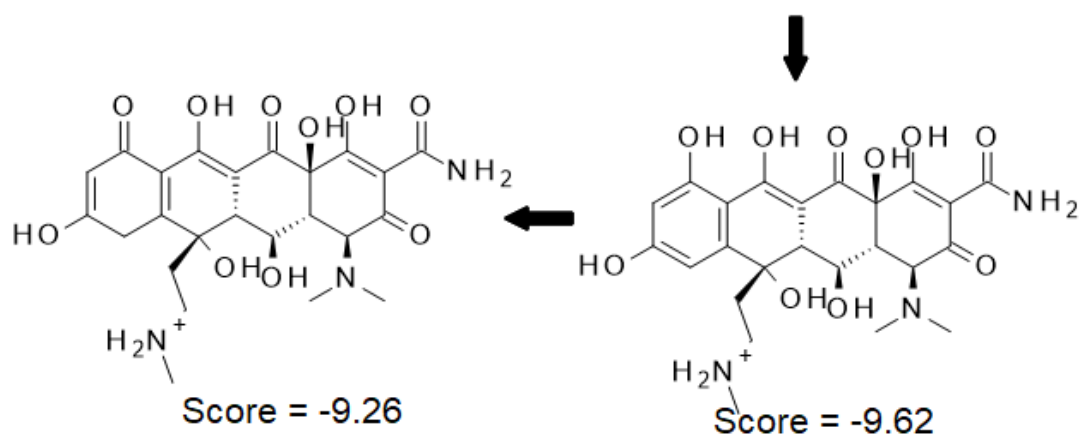

Fig. S7: Structure based drug design to optimize the potential inhibitory activity of oxytetracycline. Given scores are GVBI/WSA dG scores from docked complexes with 3Cl<sup>Pro</sup>.



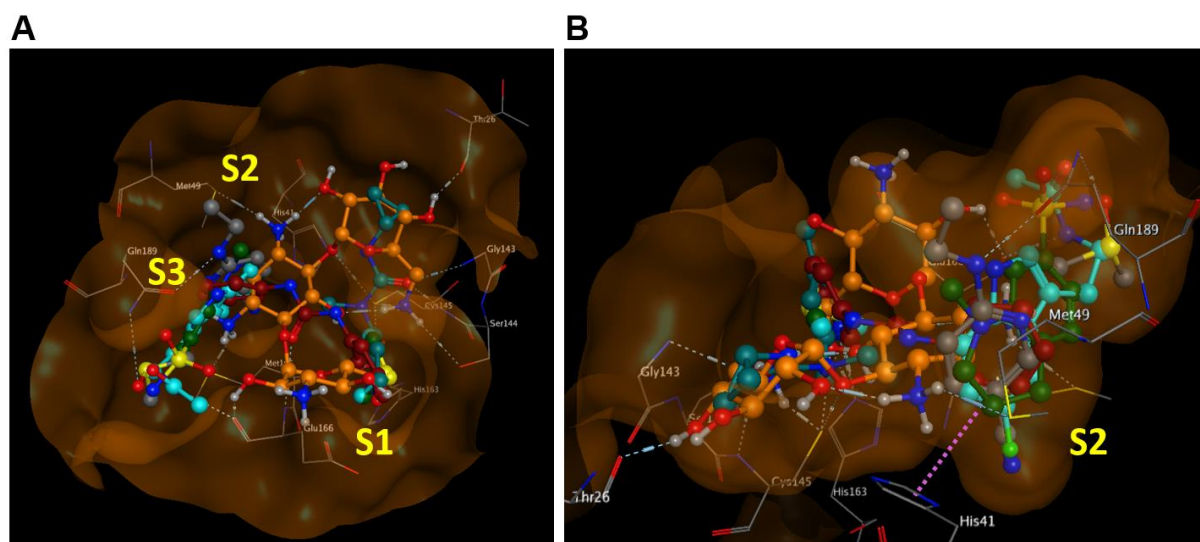

Fig. S8: Overlay of Kanamycin (orange) docked in this study and various non-covalent fragments, x0104 (S2, cyan), x0434 (dark brown), x0397 (blue green), x0195 (green), x0305 (gray) of very recent crystallographic fragment screen [1], within the binding pocket of 3CL<sup>pro</sup>. A) Top view on binding site with subpockets S1-S3. B) Side view particularly on S2 (right front) demonstrating that the aromatic group of 4 out of 5 fragments occupies the S2-sub-pocket and forms a T-shaped PI-stacking interaction with catalytic His41.

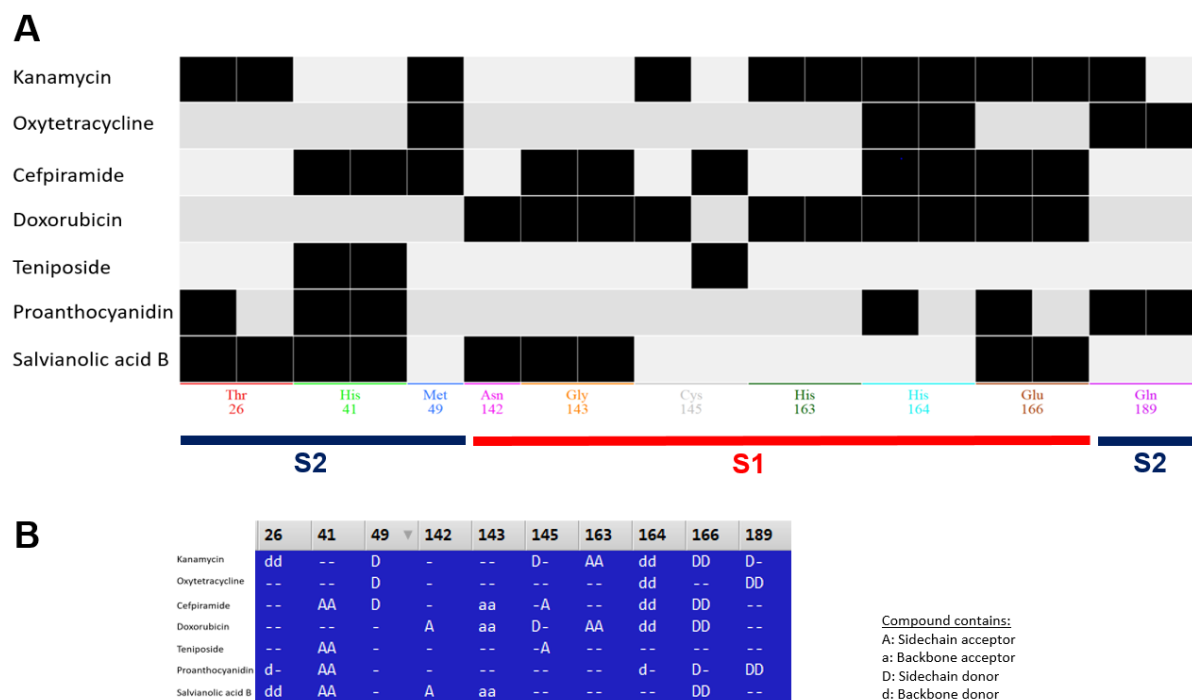

Fig. S9: Different patterns of protein-ligand interaction fingerprints (PLIFs) analysis within the active site of 3CL<sup>pro</sup>. A) PLIFs for indicated compounds showing the involved amino acids underneath. The interacting amino acids are assigned to sub-pockets S1 (red bar) or S2 (dark blue bar). B) Shows the type of interactions, in this case only H-bonds using a letter code that is explained in the legend in the right lower corner.

Table S1: Known inhibitors of 3CL<sup>pro</sup>

| Structure                                                                           | Name                              | London dG Score (MOE) | Vina Score | 3CLpro_IC50 / $\mu\text{M}$ | Literatur                                                      | Comment                                                                           |
|-------------------------------------------------------------------------------------|-----------------------------------|-----------------------|------------|-----------------------------|----------------------------------------------------------------|-----------------------------------------------------------------------------------|
| 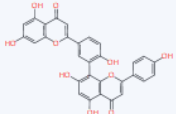   | Biflavonoid 86                    | -15.225 (mean, n=40)  | -9,6       | 8,3                         | Ryu, Y. B. Bioorg. Med. Chem. 2010, 18, 7940–7947.             | Flavonoid                                                                         |
|    | Quercetin-3- $\beta$ -galactoside | -14.507 (mean, n=130) | -8,7       | 43                          | Chen, L Bioorg. Med. Chem. 2006, 14, 8295–8306.                | Flavonoid                                                                         |
|    | Quercetin                         | -14.388 (mean, n=20)  | -7,3       | 23,8                        | Chen, L Bioorg. Med. Chem. 2006, 14, 8295–8306.                | Flavonoid                                                                         |
|    | Herbacetin                        | -14.081 (mean, n=10)  | -7,5       | 33                          | Jo, S. (2020) J Enzyme Inhib Med Chem, 35, 145-151.            | Flavonoid                                                                         |
|    | Rhoifolin                         | -13.918 (mean, n=20)  | -9,1       | 28                          | Jo, S. (2020) J Enzyme Inhib Med Chem, 35, 145-151.            | Flavonoid                                                                         |
|   | Luteolin                          | -13.808 (mean, n=20)  | -7,4       | 10,6                        | Yi, L. J. Virol. 2004, 78, 11334–11339.                        | Flavonoid anti-oxidant, anti-inflammatory, apoptosis-inducing and chemopreventive |
|  | Pectolarin                        | -12.75 (mean, n=20)   | -8,6       | 38                          | Jo, S. (2020) J Enzyme Inhib Med Chem, 35, 145-151.            | Flavonoid anti-inflammatory                                                       |
|  | Shikonin                          | -11.66 (mean, n=20)   | -7         | 16                          | DOI: 10.1101/2020.02.26.964882                                 |                                                                                   |
|  | 134                               | -11.119 (mean, n=20)  | -7,3       | 2,5                         | Kuo, C. J. FEBS Lett. 2009, 583, 549–555.                      |                                                                                   |
|  | 140                               | -11.08 (mean, n=20)   | -8,3       | 6,1                         | Ramajayam, R. Bioorg. Med. Chem. Lett. 2010, 20, 3569–3572.    |                                                                                   |
|  | 186                               | -11.04 (mean, n=20)   | -8,1       | 9,1                         | Nguyen, T. T. H. Bioorg. Med. Chem. Lett. 2011, 21, 3088–3091. |                                                                                   |
|  | 103                               | -11.013 (mean, n=20)  | -7,1       | 0,3                         | Lu, I.-L. J. Med. Chem. 2006, 49, 5154–5161.                   |                                                                                   |
|  | Betulinic acid                    | -10.944 (mean, n=20)  | -7,4       | 10                          | Wen, C.-C. J. Med. Chem. 2007, 50, 4087–4095.                  |                                                                                   |
|  | 105                               | -10.924 (mean, n=10)  | -8,3       | 3                           | Tsai, K.-C. J. Med. Chem. 2006, 49, 3485–3495.                 |                                                                                   |



| Structure                                                                           | Name                    | London dG Score (MOE) | Vina Score | 3CLpro_IC50 / $\mu\text{M}$ | Literatur                                                   | Comment                                                                                            |
|-------------------------------------------------------------------------------------|-------------------------|-----------------------|------------|-----------------------------|-------------------------------------------------------------|----------------------------------------------------------------------------------------------------|
| 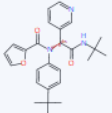   | ML188                   | -10.728 (mean, n=20)  | -7,6       | 1,5                         | Jacobs, J. (2013) J Med Chem, 56, 534-46.                   | 16-(S) enantiomer is inactive!<br>competitive and non-covalent<br>PDB 3V3M                         |
|    | Iguesterin              | -10.696 (mean, n=10)  | -8,4       | 2,6                         | Ryu, Y. B. Bioorg. Med. Chem. Lett. 2010, 20, 1873-1876.    |                                                                                                    |
|    | Savinin                 | -10.602 (mean, n=20)  | -7,7       | 25                          | Wen, C.-C. J. Med. Chem. 2007, 50, 4087-4095.               |                                                                                                    |
|    | SK23                    | -10.596 (mean, n=20)  | -7,7       | 30                          | Konno, H. (2017) Bioorg Med Chem Lett, 27, 2746-2751.       |                                                                                                    |
|    | ML300                   | -10.555 (mean, n=10)  | -7,6       | 4,1                         | Turlington, M Bioorg. Med. Chem. Lett. 2013, 23, 6172-6177. | PPB Fu (h, r): 4.8%, 10.6%<br>CL_hep (h,r): 20, 67 mL/min/kg<br>CYPs ( $\mu\text{M}$ ): 7.7 (1A"), |
|   | Isatin derivative 81    | -10.454 (mean, n=20)  | -7,9       | 1,0                         | Liu, W. Bioorg. Med. Chem. 2014, 22, 292-302.               |                                                                                                    |
|  | Isatin derivative 78    | -10.411 (mean, n=10)  | -7,3       | 0,98                        | Liu, W. Bioorg. Med. Chem. 2014, 22, 292-302.               | selective vs. Papain, chymotrypsin, trypsin                                                        |
|  | Isatin derivative 80    | -10.387 (mean, n=10)  | -7,3       | 0,95                        | Liu, W. Bioorg. Med. Chem. 2014, 22, 292-302.               |                                                                                                    |
|  | Tanshinon 7             | -10.27 (mean, n=10)   | -7         | 21                          | Park, J. Y. Bioorg Med Chem, 20, 5928-35.                   |                                                                                                    |
|  | Cinanserin              | -10.199 (mean, n=20)  | -6,5       | 125                         | DOI: 10.1101/2020.02.26.964882                              | serotonin antagonist with limited antihistaminic, anticholinergic, and immunosuppressive           |
|  | 129                     | -10.175 (mean, n=20)  | -7,4       | 13                          | Zhang, J. Bioorg. Chem. 2008, 36, 229-240.                  | non-covalent                                                                                       |
|  | Tideglusib              | -10.159 (mean, n=20)  | -7,9       | 1,55                        | DOI: 10.1101/2020.02.26.964882                              | potent anti-inflammatory and neuroprotective that is a non-ATP competitive inhibitor of glycogen   |
|  | Etacrynic acid amide 74 | -10.157 (mean, n=20)  | -7,9       | 35,3                        | Kaepler J. Med. Chem. 2005, 48, 6832-6842                   |                                                                                                    |
|  | Tanshinon 6             | -10.076 (mean, n=40)  | -7,3       | 14,4                        | Park, J. Y. Bioorg Med Chem, 20, 5928-35.                   |                                                                                                    |

|                                                                                   |           |                      |      |      |                                                                   |                                                                                               |
|-----------------------------------------------------------------------------------|-----------|----------------------|------|------|-------------------------------------------------------------------|-----------------------------------------------------------------------------------------------|
| 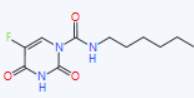 | Carmofur  | -9.4159 (mean, n=20) | -6,4 | 1,8  | DOI:<br>10.1101/2020.02.26.<br>964882                             | acute toxic<br>antimetabolite<br>(pyrimidine analogue)<br>antineoplastic<br>derivative of     |
|  | Celastrol |                      |      | 10,3 | Ryu, Y. B. Bioorg.<br>Med. Chem. Lett.<br>2010, 20,<br>1873–1876. | antioxidant and<br>anti-inflammatory<br>activity that may<br>prevent neuronal<br>degeneration |

Table S2: Docking scores of best hits from pharmacophore search of ZINC15 library. The GVBI/WSA is a forcefield-based scoring function implemented in MOE software, which estimates the free energy of binding of the ligand from a given pose [2].

| Cpd              | GVBI/WSA dG (kcal/mol) |
|------------------|------------------------|
| ZINC000008219992 | <b>-8.8</b>            |
| ZINC000096222891 | -8.5                   |
| ZINC000096114417 | <b>-9.3</b>            |
| ZINC001570001158 | -8.5                   |
| ZINC000016429284 | -8.1                   |
| ZINC000015275997 | <b>-9.5</b>            |
| ZINC000218242102 | <b>-8.8</b>            |

## References:

- [1] A. Douangamath, D. Fearon, P. Gehrtz, T. Krojer, P. Lukacik, C.D. Owen, E. Resnick, C. Strain-Damerell, A. Aimon, P. Ábrányi-Balogh, J. Brandaõ-Neto, A. Carbery, G. Davison, A. Dias, T.D. Downes, L. Dunnett, M. Fairhead, J.D. Firth, S.P. Jones, A. Keely, G.M. Keserü, H.F. Klein, M.P. Martin, M.E.M. Noble, P. O'Brien, A. Powell, R. Reddi, R. Skyner, M. Snee, M.J. Waring, C. Wild, N. London, F. von Delft, M.A. Walsh, bioRxiv, (2020) 2020.2005.2027.118117.
- [2] C.R. Corbeil, C.I. Williams, P. Labute, J Comput Aided Mol Des, 26 (2012) 775-786.
